# Supplementary material for: SLICER: inferring branched, nonlinear cellular trajectories from single cell RNA-seq data
Source: PubMed Central journal article supplement (PMC4877799; doi:10.1186/s13059-016-0975-3), 2016-05-23
Supplement: 13059_2016_975_MOESM2_ESM.pdf [file 13059_2016_975_MOESM2_ESM.pdf]

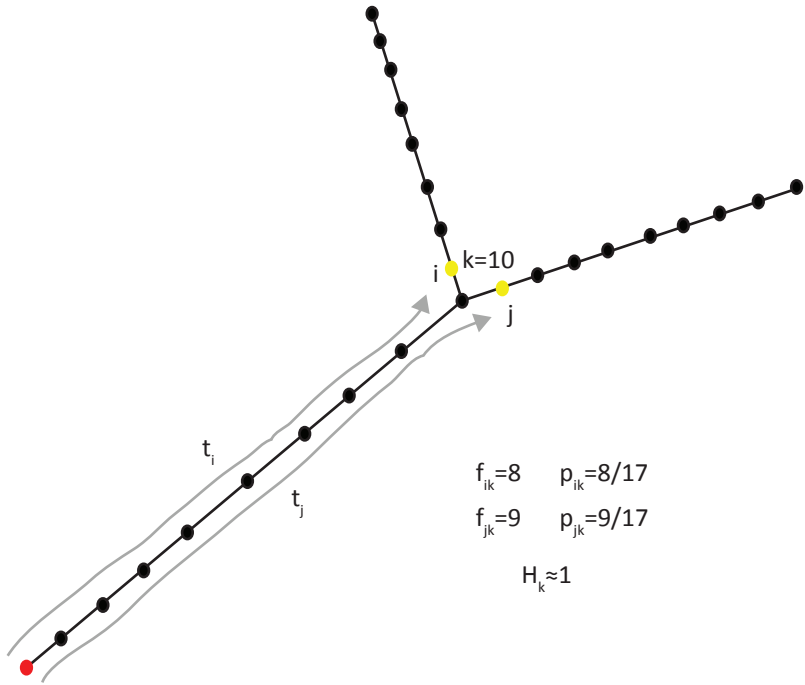

$$f_{ik} = 8 \quad p_{ik} = 8/17$$

$$f_{jk} = 9 \quad p_{jk} = 9/17$$

$$H_k \approx 1$$
