# Supplementary material for: SLICER: inferring branched, nonlinear cellular trajectories from single cell RNA-seq data
Source: PubMed Central journal article supplement (PMC4877799; doi:10.1186/s13059-016-0975-3), 2016-05-23

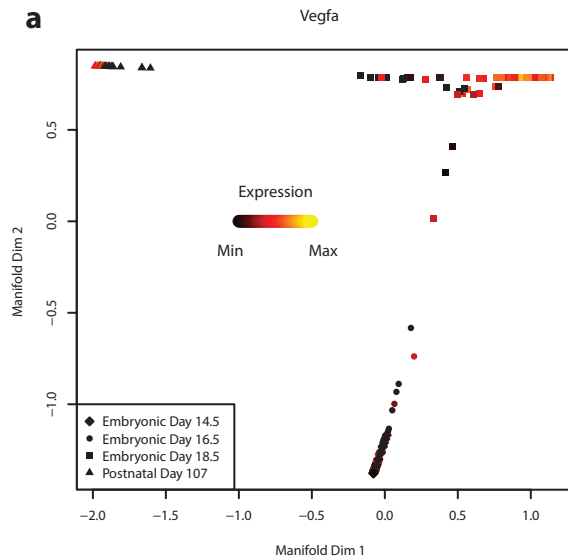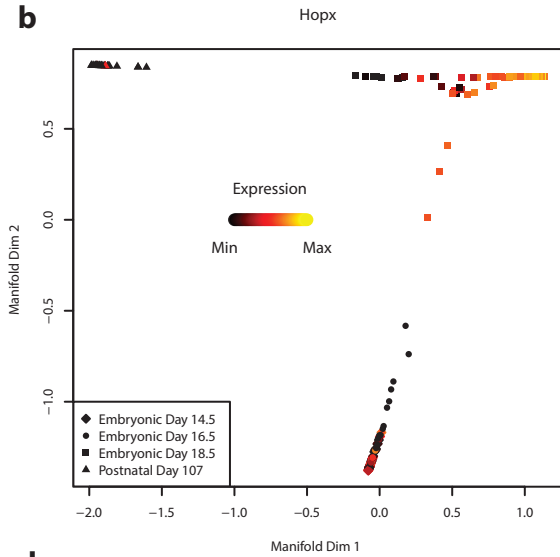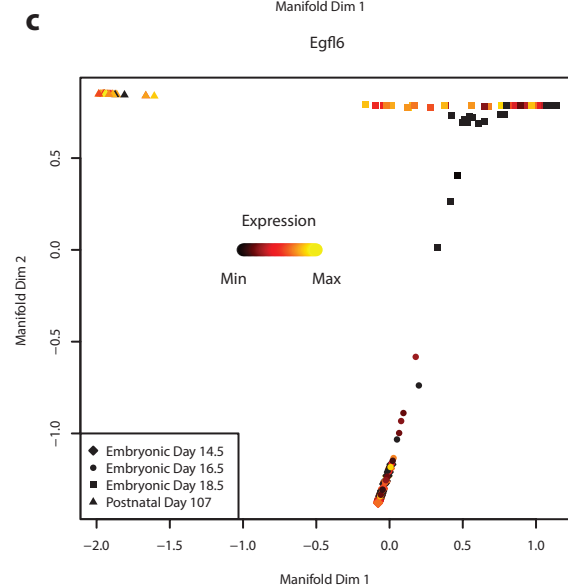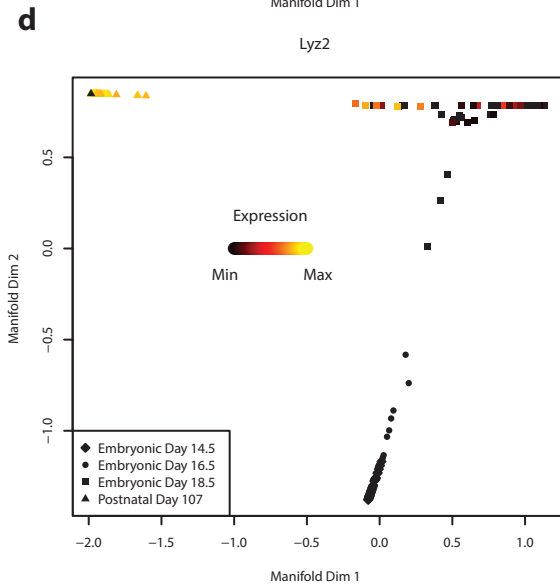

Supplement: 13059_2016_975_MOESM5_ESM.pdf [file 13059_2016_975_MOESM5_ESM.pdf]
